# Supplementary material for: Clinical multiplexed exome sequencing distinguishes adult oligodendroglial neoplasms from astrocytic and mixed lineage gliomas
Source: PubMed Central journal article supplement (PMC4226668; doi:10.18632/oncotarget.2342), 2014-08-12
Supplement: oncotarget-05-8083-s001.pdf [file oncotarget-05-8083-s001.pdf]

# Clinical multiplexed exome sequencing distinguishes adult oligodendroglial neoplasms from astrocytic and mixed lineage gliomas

## Supplementary Material

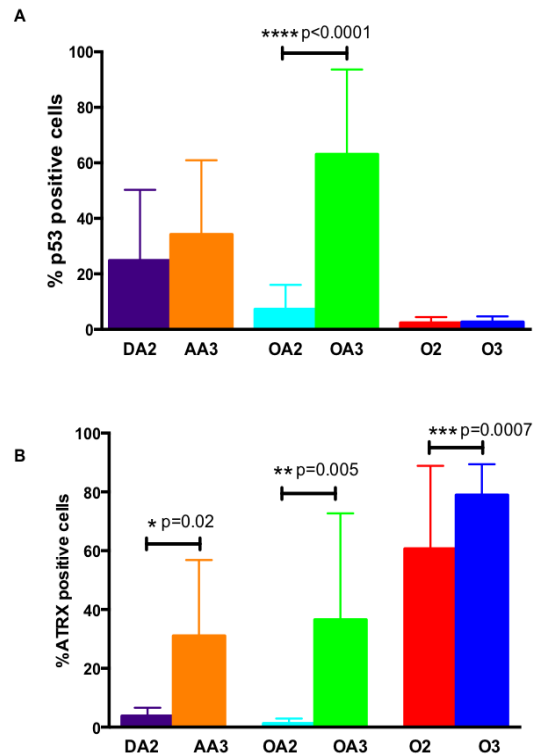

**Supplemental Figure 1:** (A) Quantification of p53 expression by tumor lineage and grade. Only oligoastrocytomas showed a significant increase in p53 nuclear positivity with increasing grade. (B) Quantification of ATRX expression by tumor lineage and grade revealed a significant increase in nuclear positivity with increasing grade across all lineages.

**Supplemental Table 1:** 1p/19q status, *IDH1*, *IDH2*, *TP53*, *ATRX* and *PTEN* mutations in individual DA2 samples.

| Sample ID | 1p/19q status | <i>IDH1</i> | <i>IDH2</i> | <i>TP53</i> | <i>ATRX</i> | <i>PTEN</i> |
|-----------|---------------|-------------|-------------|-------------|-------------|-------------|
| DA2-1     | intact        | p.R132H     | --          | p.R248Q     | p.E1702*    | --          |
| DA2-2     | intact        | p.R132H     | --          | p.Y163H     | --          | --          |
| DA2-3     | intact        | p.R132C     | --          | p.I195F     | p.K971fs    | --          |
| DA2-4     | intact        | --          | --          | --          | --          | --          |
| DA2-5     | intact        | --          | --          | --          | --          | p.G165R     |
| DA2-6     | intact        | p.R132H     | --          | p.R209fs*6  | p.R808*     | --          |
| DA2-7     | intact        | p.R132H     | --          | p.R213*     | --          | --          |
| DA2-8     | intact        | p.R132L     | --          | p.R248W     | p.K971fs    | --          |
| DA2-9     | intact        | p.R132H     | --          | p.R273C     | p.F2113fs   | --          |
| DA2-10    | intact        | --          | --          | --          | --          | --          |

**Supplemental Table 2:** 1p/19q status, *IDH1*, *IDH2*, *TP53*, *ATRX* and *PTEN* mutations in individual AA3 samples.

| Sample ID | 1p/19q status | <i>IDH1</i> | <i>IDH2</i> | <i>TP53</i>            | <i>ATRX</i>          | <i>PTEN</i>   |
|-----------|---------------|-------------|-------------|------------------------|----------------------|---------------|
| AA3-1     | intact        | --          | --          | p.E3G                  | --                   | --            |
| AA3-2     | intact        | --          | --          | --                     | --                   | p.318_319insK |
| AA3-3     | intact        | p.R132H     | --          | p.R273C                | p.R781*              | --            |
| AA3-4     | intact        | --          | --          | --                     | --                   | --            |
| AA3-5     | intact        | p.R132H     | --          | p.A138V<br>p.P152fs*18 | p.R2197C             | --            |
| AA3-6     | intact        | p.R132H     | --          | p.R273C                | --                   | p.K425fs      |
| AA3-7     | intact        | p.R132H     | --          | p.R273C                | p.E2265A<br>p.E2277A | --            |
| AA3-8     | intact        | p.R132H     | --          | p.C242Y                | p.L1602*             | --            |
| AA3-9     | intact        | --          | --          | --                     | --                   | --            |
| AA3-10    | intact        | p.R132H     | --          | p.S241F                | p.D789V              | --            |
| AA3-11    | intact        | p.R132C     | --          | p.R273C                | p.S1418fs            | --            |
| AA3-12    | intact        | --          | --          | --                     | --                   | p.F241fs      |
| AA3-13    | intact        | --          | --          | p.P27L                 | --                   | p.R159K       |
| AA3-14    | intact        | --          | --          | --                     | --                   | --            |
| AA3-15    | intact        | p.R132H     | --          | p.R273C                | --                   | --            |
| AA3-16    | intact        | p.R132S     | --          | p.R273C                | p.R418*              | p.I135fs      |
| AA3-17    | intact        | p.R132H     | --          | p.K132R                | p.S1387*             | --            |
| AA3-18    | intact        | p.R132H     | --          | p.R175H<br>p.R213Q     | p.R808*<br>p.K1332fs | --            |

**Supplemental Table 3:** 1p/19q status, *IDH1*, *IDH2*, *TP53*, *ATRX* and *PTEN* mutations in individual OA2 samples.

| <b>Sample ID</b> | <b>1p/19q status</b> | <b><i>IDH1</i></b> | <b><i>IDH2</i></b> | <b><i>TP53</i></b> | <b><i>ATRX</i></b> | <b><i>PTEN</i></b> |
|------------------|----------------------|--------------------|--------------------|--------------------|--------------------|--------------------|
| OA2-1            | intact               | --                 | --                 | --                 | --                 | --                 |
| OA2-2            | intact               | p.R132H            | --                 | p.G245S            | p.R1426*           | --                 |
| OA2-3            | intact               | p.R132H            | --                 | p.R273C            | --                 | --                 |
| OA2-4            | intact               | p.R132C            | --                 | p.R306*            | p.K1332fs          | --                 |
| OA2-5            | intact               | p.R132H            | --                 | p.R175H<br>p.C242S | p.R418*            | --                 |
| OA2-6            | intact               | p.R132H            | --                 | p.P152R<br>p.M246L | p.K2283splice      | --                 |
| OA2-7            | intact               | p.R132H            | --                 | --                 | --                 | --                 |

**Supplemental Table 4:** 1p/19q status, *IDH1*, *IDH2*, *TP53*, *ATRX* and *PTEN* mutations in individual OA3 samples.

| <b>Sample ID</b> | <b>1p/19q status</b> | <b><i>IDH1</i></b> | <b><i>IDH2</i></b> | <b><i>TP53</i></b> | <b><i>ATRX</i></b> | <b><i>PTEN</i></b> |
|------------------|----------------------|--------------------|--------------------|--------------------|--------------------|--------------------|
| OA3-1            | intact               | p.R132L            | --                 | p.R273C            | p.R781*            | --                 |
| OA3-2            | intact               | p.R132H            | --                 | p.Y205C<br>p.M237I | --                 | --                 |
| OA3-3            | co-del               | p.R132H            | --                 | p.P190L            | p.G1937E           | p.P231S            |
| OA3-4            | co-del               | p.R132H            | --                 | --                 | --                 | --                 |
| OA3-5            | intact               | p.R132H            | --                 | p.R213Q            | p.Y2083C           | --                 |
| OA3-6            | intact               | p.R132H            | --                 | p.E258Q            | --                 | --                 |
| OA3-7            | intact               | p.R132H            | --                 | p.R273C            | p.R1426*           | --                 |
| OA3-8            | intact               | p.R132H            | --                 | p.W53*<br>p.L194R  | p.E935*<br>p.E884D | --                 |

**Supplemental Table 5:** 1p/19q status, *IDH1*, *IDH2*, *TP53*, *ATRX* and *PTEN* mutations in individual O2 samples.

| Sample ID | 1p/19q status | <i>IDH1</i> | <i>IDH2</i> | <i>TP53</i> | <i>ATRX</i> | <i>PTEN</i> |
|-----------|---------------|-------------|-------------|-------------|-------------|-------------|
| O2-1      | co-del        | p.R132H     | --          | --          | --          | --          |
| O2-2      | co-del        | p.R132H     | --          | --          | --          | --          |
| O2-3      | co-del        | p.R132H     | --          | --          | --          | --          |
| O2-4      | co-del        | --          | p.R172K     | --          | --          | --          |
| O2-5      | co-del        | p.R132H     | --          | --          | --          | --          |
| O2-6      | co-del        | p.R132H     | --          | --          | --          | --          |
| O2-7      | co-del        | p.R132S     | --          | --          | p.D1051E    | --          |
| O2-8      | co-del        | p.R132H     | --          | --          | --          | --          |
| O2-9      | co-del        | p.R132H     | --          | --          | --          | --          |
| O2-10     | co-del        | p.R132H     | --          | --          | --          | --          |
| O2-11     | co-del        | p.R132H     | --          | --          | --          | --          |
| O2-12     | co-del        | p.R132H     | --          | --          | --          | --          |
| O2-13     | co-del        | p.R132H     | --          | --          | --          | --          |
| O2-14     | co-del        | p.R132H     | --          | --          | --          | --          |
| O2-15     | co-del        | p.R132H     | --          | --          | --          | --          |
| O2-16     | co-del        | p.R132H     | --          | --          | --          | --          |
| O2-17     | co-del        | p.R132H     | --          | --          | --          | --          |
| O2-18     | co-del        | p.R132H     | --          | --          | --          | --          |
| O2-19     | co-del        | p.R132H     | --          | --          | --          | --          |
| O2-20     | co-del        | p.R132H     | --          | --          | --          | --          |
| O2-21     | co-del        | p.R132H     | --          | --          | --          | --          |
| O2-22     | co-del        | p.R132H     | --          | --          | --          | --          |
| O2-23     | co-del        | p.R132H     | --          | --          | --          | --          |
| O2-24     | co-del        | p.R132H     | --          | --          | --          | --          |
| O2-25     | co-del        | p.R132H     | --          | --          | --          | --          |
| O2-26     | co-del        | p.R132H     | --          | --          | --          | --          |
| O2-27     | co-del        | --          | p.R172K     | --          | --          | --          |
| O2-28     | co-del        | p.R132H     | --          | --          | --          | --          |
| O2-29     | co-del        | p.R132H     | --          | --          | --          | --          |
| O2-30     | co-del        | p.R132H     | --          | --          | --          | --          |
| O2-31     | co-del        | p.R132H     | --          | --          | --          | --          |
| O2-32     | co-del        | p.R132H     | --          | --          | --          | --          |
| O2-33     | co-del        | p.R132H     | --          | --          | --          | --          |
| O2-34     | co-del        | p.R132H     | --          | --          | --          | --          |
| O2-35     | co-del        | p.R132G     | --          | --          | --          | --          |
| O2-36     | co-del        | p.R132H     | --          | --          | --          | --          |
| O2-37     | co-del        | p.R132H     | --          | --          | --          | --          |
| O2-38     | co-del        | p.R132H     | --          | --          | --          | --          |
| O2-39     | co-del        | --          | p.R172K     | --          | --          | --          |
| O2-40     | co-del        | p.R132H     | --          | --          | --          | --          |
| O2-41     | co-del        | p.R132H     | --          | --          | --          | --          |
| O2-42     | co-del        | --          | p.R172K     | --          | --          | --          |
| O2-43     | co-del        | p.R132H     | --          | --          | --          | --          |
| O2-44     | co-del        | p.R132H     | --          | --          | --          | --          |

**Supplemental Table 6:** 1p/19q status, *IDH1*, *IDH2*, *TP53*, *ATRX* and *PTEN* mutations in individual O3 samples.

| <b>Sample ID</b> | <b>1p/19q status</b> | <b><i>IDH1</i></b> | <b><i>IDH2</i></b> | <b><i>TP53</i></b> | <b><i>ATRX</i></b> | <b><i>PTEN</i></b> |
|------------------|----------------------|--------------------|--------------------|--------------------|--------------------|--------------------|
| O3-1             | intact               | p.R132H            | --                 | p.R273C            | --                 | --                 |
| O3-2             | co-del               | p.R132H            | --                 | --                 | --                 | --                 |
| O3-3             | co-del               | p.R132H            | --                 | p.T329I            | --                 | p.P204S            |
| O3-4             | co-del               | p.R132H            | --                 | --                 | --                 | --                 |
| O3-5             | co-del               | p.R132H            | --                 | --                 | --                 | --                 |
| O3-6             | co-del               | p.R132H            | --                 | --                 | --                 | --                 |
| O3-7             | co-del               | p.R132H            | --                 | --                 | --                 | --                 |
| O3-8             | co-del               | p.R132H            | --                 | --                 | --                 | p.D52del           |
| O3-9             | co-del               | p.R132H            | --                 | --                 | --                 | --                 |
| O3-10            | co-del               | p.R132H            | -                  | --                 | --                 | --                 |
| O3-11            | co-del               | p.R132H            | --                 | --                 | --                 | --                 |
| O3-12            | co-del               | p.R132H            | --                 | --                 | --                 | --                 |
| O3-13            | co-del               | --                 | p.R172W            | --                 | p.G2075R           | --                 |
| O3-14            | co-del               | p.R132H            | --                 | --                 | --                 | --                 |
| O3-15            | co-del               | --                 | p.R172K            | --                 | --                 | --                 |
| O3-16            | co-del               | p.R132H            | --                 | p.T284fs           | --                 | --                 |
| O3-17            | co-del               | p.R132H            | --                 | --                 | --                 | --                 |
| O3-18            | co-del               | --                 | p.R172K            | --                 | --                 | --                 |
| O3-19            | co-del               | p.R132H            | --                 | --                 | --                 | --                 |
| O3-20            | co-del               | p.R132H            | --                 | --                 | --                 | --                 |
| O3-21            | co-del               | p.R132H            | --                 | p.R335C            | --                 | --                 |
